# Supplementary material
Source: Springer Nature journal article supplement (https://www.springermedizin.de/resource/supplementary/13229_2010_16_MOESM12_ESM.pdf/9675994)

Scen2 (Recessive)

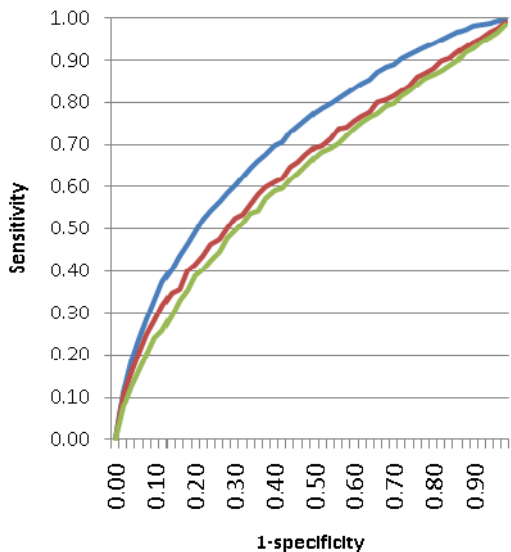

Scen2 (Multiplicative)

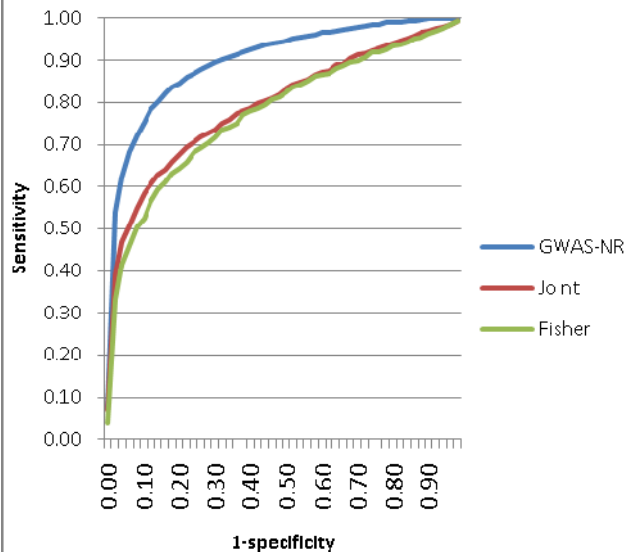

Scen2 (Dominant)

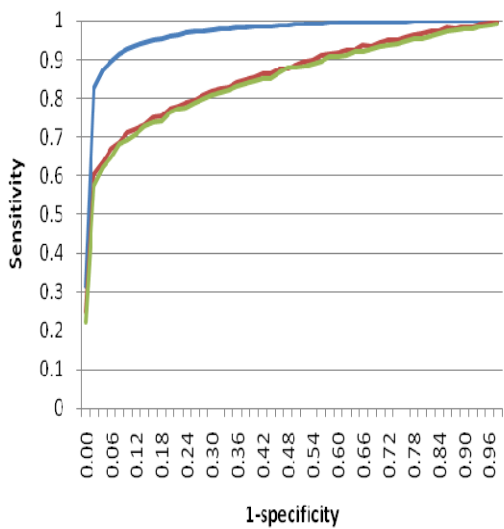

Scen2 (Additive)

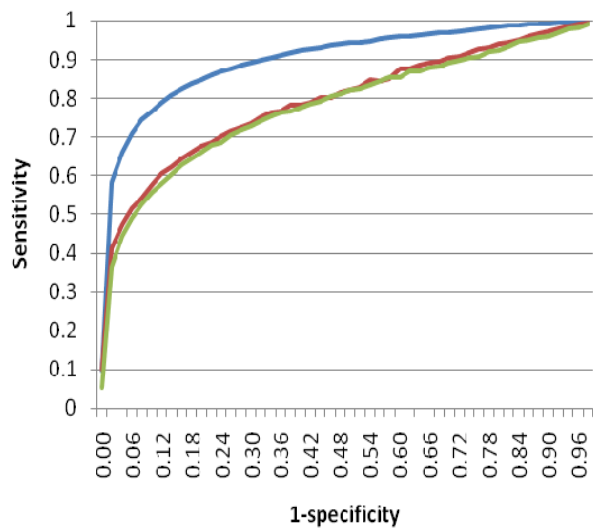

Supplement: MOESM12 [file 9675994]
